# Supplementary material for: Prognostic factors of in-hospital complications after hip fracture surgery: a scoping review
Source: Springer Nature journal article supplement (doi:10.1007/s00198-019-04976-x), 2019-04-29
Supplement: MOESM1 [file 16684520]

Medline / Embase Search strategy

1. hip fractures/

2. femoral neck fractures/

3. ((hip or femoral neck) adj5 fracture?).tw.

4. Hip/

5. Femoral Fractures/

6. Fractures, Ununited/

7. Fractures, Bone/

8. osteoporotic Fractures/

9. or/5-8

10. 4 and 9

11. or/1-3,10 [Hip Fractures]

12. complication.mp.

13. Diabetes complications

14. Postoperative complications

15. or/12-14

13. 11 and 15

Filters: English and Humans
